# Supplementary material for: Trypsin- and Chymotrypsin-Like Serine Proteases in Schistosoma mansoni – ‘The Undiscovered Country’
Source: PubMed Central journal article supplement (PMC3967958; doi:10.1371/journal.pntd.0002766), 2014-03-27
Supplement: pntd.0002766.s006.pdf [file pntd.0002766.s006.pdf]

| <b><u>Primer set</u></b> | <b><u>Forward qPCR primers</u></b> | <b><u>Reverse qPCR primers</u></b> |
|--------------------------|------------------------------------|------------------------------------|
| <b>SmSP1cub</b>          | TTTCCAATCTTTGATACTGAATGTG          | ACGATCTTGTGGATTAACATGAATTA         |
| <b>SmSP1Idla</b>         | TCGAATGGAAATGTCCAACA               | GCCCCAGTTTTCTTCGTTATC              |
| <b>SmSP1trypsin</b>      | TGGGGAGATACACATAATACAGG            | GCCCCATGATACAATTCCAG               |
| <b>SmSP2</b>             | GCTGCACAAATTGATCATCG               | ACCCCAACCAACAGCATAAC               |
| <b>SmSP3cub</b>          | TGGTCAATTAATAATTACCTAATCCAA        | GAAGAAGAAAACCTTTTCCATGA            |
| <b>SmSP3trypsin</b>      | GGACAGTCCACATTGGTGATT              | CCCATCCTGCAACATAACAA               |
| <b>SmSP4</b>             | CATGTGCCACAGACATATCG               | TCCACAATGGATAATGACAGC              |
| <b>SmSP5</b>             | TGTCAATGGGTCAATTACGTTT             | CCAACCATTTCCAGCTATTGA              |
