# Supplementary material for: Trypsin- and Chymotrypsin-Like Serine Proteases in Schistosoma mansoni – ‘The Undiscovered Country’
Source: PubMed Central journal article supplement (PMC3967958; doi:10.1371/journal.pntd.0002766), 2014-03-27
Supplement: pntd.0002766.s007.pdf [file pntd.0002766.s007.pdf]

| <b>Group of serine proteases</b>                     | <b>Taxon</b>                         |
|------------------------------------------------------|--------------------------------------|
| <b>Vertebrate plasmakallikreins</b>                  |                                      |
| AAA63393                                             | <i>Mus musculus</i>                  |
| NP_001086768                                         | <i>Xenopus laevis</i>                |
| <b>Vertebrate transmembrane SPs</b>                  |                                      |
| EDM10970                                             | <i>Rattus norvegicus</i>             |
| AAF97867                                             | <i>Mus musculus</i>                  |
| <b>Vertebrate plasminogens</b>                       |                                      |
| XP_003503110                                         | <i>Cricetulus griseus</i>            |
| BAG60586                                             | <i>Homo sapiens</i>                  |
| CAF97472                                             | <i>Tetraodon nigroviridis</i>        |
| <b>Vertebrate suppressors of tumorigenicity</b>      |                                      |
| XP_416635                                            | <i>Gallus gallus</i>                 |
| XP_003459181                                         | <i>Oreochromis niloticus</i>         |
| XP_003222437                                         | <i>Anolis carolinensis</i>           |
| <b>Trematode SP group 3</b>                          |                                      |
| KF510121                                             | <i>Schistosoma mansoni</i>           |
| CAX73257                                             | <i>Schistosoma japonicum</i>         |
| GAA27232                                             | <i>Clonorchis sinensis</i>           |
| <b>Trematode SP group 1</b>                          |                                      |
| GAA38267                                             | <i>Clonorchis sinensis</i>           |
| KF535923                                             | <i>Schistosoma mansoni</i>           |
| <b>Vertebrate brain-specific SPs</b>                 |                                      |
| XP_510756                                            | <i>Pan troglodytes</i>               |
| XP_001498424                                         | <i>Equus caballus</i>                |
| NP_001100454                                         | <i>Rattus norvegicus</i>             |
| XP_003478171                                         | <i>Cavia porcellus</i>               |
| XP_001371793                                         | <i>Monodelphis domestica</i>         |
| CAJ83405                                             | <i>Xenopus (Silurana) tropicalis</i> |
| <b>Vertebrate intestinal SPs</b>                     |                                      |
| CAB56465                                             | <i>Mus musculus</i>                  |
| XP_003509591                                         | <i>Cricetulus griseus</i>            |
| <b>Vertebrate tryptases</b>                          |                                      |
| 2BM2_A                                               | <i>Homo sapiens</i>                  |
| NP_999356                                            | <i>Sus scrofa</i>                    |
| <b>Vertebrate testisin-like SPs</b>                  |                                      |
| XP_003438688                                         | <i>Oreochromis niloticus</i>         |
| AAI33113                                             | <i>Danio rerio</i>                   |
| ACO14162                                             | <i>Esox lucius</i>                   |
| <b>Insect plasminogen-like and transmembrane SPs</b> |                                      |
| XP_003398242                                         | <i>Bombus terrestris</i>             |
| XP_003485973                                         | <i>Bombus impatiens</i>              |
| XP_393727                                            | <i>Apis mellifera</i>                |
| EFN72139                                             | <i>Camponotus floridanus</i>         |
| EGI71013                                             | <i>Acromyrmex echinatior</i>         |
| XP_001661604                                         | <i>Aedes aegypti</i>                 |
| XP_001847507                                         | <i>Culex quinquefasciatus</i>        |
| XP_002021180                                         | <i>Drosophila persimilis</i>         |

|                                     |                                     |
|-------------------------------------|-------------------------------------|
| EFR21103                            | <i>Anopheles darlingi</i>           |
| <b>Trematode SP group 2</b>         |                                     |
| CAX74751                            | <i>Schistosoma japonicum</i>        |
| AAW24683                            | <i>Schistosoma japonicum</i>        |
| KF510120                            | <i>Schistosoma mansoni</i>          |
| GAA32831                            | <i>Clonorchis sinensis</i>          |
| <b>Cestode trypsin-like SP</b>      |                                     |
| ADP89566                            | <i>Taenia solium</i>                |
| AAL14214                            | <i>Echinococcus granulosus</i>      |
| <b>Trematode SP group 4</b>         |                                     |
| GAA56573                            | <i>Clonorchis sinensis</i>          |
| GAA50807                            | <i>Clonorchis sinensis</i>          |
| GAA50619                            | <i>Clonorchis sinensis</i>          |
| KF510122                            | <i>Schistosoma mansoni</i>          |
| <b>Vertebrate elastases</b>         |                                     |
| AAT45251                            | <i>Sparus aurata</i>                |
| P00773                              | <i>Rattus norvegicus</i>            |
| XP_002716042                        | <i>Oryctolagus cuniculus</i>        |
| P08861                              | <i>Homo sapiens</i>                 |
| P08419                              | <i>Sus scrofa</i>                   |
| P00774                              | <i>Rattus norvegicus</i>            |
| <b>Vertebrate chymotrypsins</b>     |                                     |
| P17538                              | <i>Homo sapiens</i>                 |
| P00767                              | <i>Bos taurus</i>                   |
| P47796                              | <i>Gadus morhua</i>                 |
| XP_511044                           | <i>Pan troglodytes</i>              |
| XP_003225400                        | <i>Anolis carolinensis</i>          |
| <b>Vertebrate kallikreins</b>       |                                     |
| P00759                              | <i>Homo sapiens</i>                 |
| P06870                              | <i>Homo sapiens</i>                 |
| P49862                              | <i>Homo sapiens</i>                 |
| <b>Vertebrate trypsins</b>          |                                     |
| P00760                              | <i>Bos taurus</i>                   |
| P00762                              | <i>Rattus norvegicus</i>            |
| P35031                              | <i>Salmo salar</i>                  |
| <b>Trematode SP group 5</b>         |                                     |
| ACR27083                            | <i>Schistosoma japonicum</i>        |
| AAM43942                            | <i>Schistosoma mansoni</i>          |
| AF510342                            | <i>Schistosoma haematobium</i>      |
| AAM43945                            | <i>Schistosomatium douthitti</i>    |
| AAM43943                            | <i>Schistosoma haematobium</i>      |
| AAM43941                            | <i>Schistosoma mansoni</i>          |
| KF939306                            | <i>Schistosoma mansoni</i>          |
| GAA38503                            | <i>Schistosoma japonicum</i>        |
| CAX73292                            | <i>Clonorchis sinensis</i>          |
| <b>Insect chymotrypsin-like SPs</b> |                                     |
| AAF91345                            | <i>Glossina morsitans morsitans</i> |
| XP_002052080                        | <i>Drosophila virilis</i>           |
| <b>Insect chymotrypsins</b>         |                                     |

|                                                     |                                   |
|-----------------------------------------------------|-----------------------------------|
| Q27289                                              | <i>Anopheles gambiae</i>          |
| P00769                                              | <i>Vespa crabro</i>               |
| <b>Crustacean brachyurin C and chymotrypsin SPs</b> |                                   |
| Q8WR11                                              | <i>Paralithodes camtschaticus</i> |
| P00771                                              | <i>Uca pugilator</i>              |
| Q00871                                              | <i>Litopenaeus vannamei</i>       |
| <b>Insect chymotrypsins</b>                         |                                   |
| Q9VRT1                                              | <i>Drosophila melanogaster</i>    |
| XP_002046524                                        | <i>Drosophila virilis</i>         |
| <b>Insect trypsins</b>                              |                                   |
| XP_001663898                                        | <i>Aedes aegypti</i>              |
| P29787                                              | <i>Aedes aegypti</i>              |
| P35040                                              | <i>Anopheles gambiae</i>          |
| AAV84270                                            | <i>Culicoides sonorensis</i>      |
| ACR61326                                            | <i>Drosophila navajoa</i>         |
| ABR88248                                            | <i>Heliopsis virescens</i>        |
| AEI58562                                            | <i>Eupolyphaga sinensis</i>       |
| XP_003402915                                        | <i>Bombus terrestris</i>          |
| Q9XY56                                              | <i>Ctenocephalides felis</i>      |
| ACY24329                                            | <i>Ctenocephalides felis</i>      |
| EEZ99377                                            | <i>Tribolium castaneum</i>        |
| Q9XYX9                                              | <i>Rhyzopertha dominica</i>       |
| <b>Crustacean trypsins</b>                          |                                   |
| Q9TY16                                              | <i>Litopenaeus vannamei</i>       |
| O62562                                              | <i>Litopenaeus vannamei</i>       |
| Q8WR10                                              | <i>Paralithodes camtschaticus</i> |
| P00765                                              | <i>Astacus astacus</i>            |
| AAP55756                                            | <i>Lepeophtheirus salmonis</i>    |
| <b>Sponge trypsin</b>                               |                                   |
| Q8I9P2                                              | <i>Aplysina fistularis</i>        |
| <b>Bacterial trypsin</b>                            |                                   |
| P00775                                              | <i>Streptomyces griseus</i>       |
